# Supplementary material for: A dynamically gated triangular DNA nanopore for molecular sensing and cross-membrane transport
Source: Research Square preprint supplement (doi:10.21203/rs.3.rs-3878148/v1), 2024-02-01
Supplement: Supplementary file 1 [file 0a00cf722b1071a7c42e8b7f.xlsx]

## Sheet: All staple strands
Position	Name	Sequence (5'-3')	Color
Subunits for DNP-E/DNP-C	Common staple strand 1	CACCCTCTCGCTGACGACAATCTTTCGAAAAGGCTAGGAATTGCGAATA
Subunits for DNP-E/DNP-C	Common staple strand 2	ACGGAATTAAAGGTGAATTGC
Subunits for DNP-E/DNP-C	Common staple strand 3	ACCGTGCGACCGTAGAAAGACACCACCAAGGCAGG
Subunits for DNP-E/DNP-C	Common staple strand 4	TATTCGGAGCAGCGAAGACTTTTAGTAGGGCTTAAGGATCGT
Subunits for DNP-E/DNP-C	Common staple strand 5	TTTTGGGTAAAGAAAGATAATGCTAACGCGATTTT
Subunits for DNP-E/DNP-C	Common staple strand 6	CCACTATGTCGAGGCACTAAA
Subunits for DNP-E/DNP-C	Common staple strand 7	ACGACGGCCAGTGCGGGTAACGCAACTGCTGGTGCCGGCCTCCATCGTA
Subunits for DNP-E/DNP-C	Common staple strand 8	TATCACCATATAAGAAGAGAA
Subunits for DNP-E/DNP-C	Common staple strand 9	GGAGGCCGATTAAACTGAGAATCTTTGAACTCAAAACCTACATACATTG
Subunits for DNP-E/DNP-C	Common staple strand 10	CCTTGAGGATAAATCACTATCGGTCTTTATCGCGTACAAACG
Subunits for DNP-E/DNP-C	Common staple strand 11	ACCACCCCACCAGATTCAAATACCCTGACAGGCAAGCCATTC
Subunits for DNP-E/DNP-C	Common staple strand 12	TATTTCAACGCAAGACATTATTCTACTAAGCTATAAGTTTGAATTCCAT
Subunits for DNP-E/DNP-C	Common staple strand 13	GTGGCAATCAATCATACCACACATCAATGAGCGGAAGCGGTC
Subunits for DNP-E/DNP-C	Common staple strand 14	ACAGCCAGAAGCGCTTGGGCTGAGAAACGTAAAAGTCGTTAG
Subunits for DNP-E/DNP-C	Common staple strand 15	TCAGACGATATTCAAGAGCAATGTGTCGTTTTCCCTTGTAAA
Subunits for DNP-E/DNP-C	Common staple strand 16	GCATCGGCTGCATAACCGATA
Subunits for DNP-E/DNP-C	Common staple strand 17	CGTAACAGCAAGCCTTAGACTCGAAAGAGACAGTCATTCAAA
Subunits for DNP-E/DNP-C	Common staple strand 18	TCGCTATTACGCCATCACTGCCTGCATTGACGGGC
Subunits for DNP-E/DNP-C	Common staple strand 19	ATTTTTAGAACCCTTTTAAATCGGTTGTAGTTTCCAGGACTAAAAGACA
Subunits for DNP-E/DNP-C	Common staple strand 20	GATAGAAGATTATTTTTTGAC
Subunits for DNP-E/DNP-C	Common staple strand 21	CAAAAACCGATGAAAATTAAT
Subunits for DNP-E/DNP-C	Common staple strand 22	GAACGCCAAACGTTTTGTATA
Subunits for DNP-E/DNP-C	Common staple strand 23	GCGGGAGAGTGAGGATTAACCGGTAATAAGGAAAACACACGA
Subunits for DNP-E/DNP-C	Common staple strand 24	GGCTTTGATTAAACCGCTGAGAGTGAATGCGAGGT
Subunits for DNP-E/DNP-C	Common staple strand 25	TGCTATTTTCCAGATTAGAGCTACATCGGCCGGCGTGGCAAG
Subunits for DNP-E/DNP-C	Common staple strand 26	TAGCATTGAACCGCATTAAGAGGGTAAATGATAAACATATAT
Subunits for DNP-E/DNP-C	Common staple strand 27	CGACGACTTGAAATAAATATAAATCGCGAAAGGAACAACAGA
Subunits for DNP-E/DNP-C	Common staple strand 28	AGGCGGAGCCACCCAGAGCCAAACTACAGTTAGCGTTCAACAGTTTCAG
Subunits for DNP-E/DNP-C	Common staple strand 29	AGAACAAATTAAACCTTTTTCACCGACCCAGAATCGGGATTT
Subunits for DNP-E/DNP-C	Common staple strand 30	CCGATTTAGAGCCGCTACGTG
Subunits for DNP-E/DNP-C	Common staple strand 31	ATAATTTAAAATCTACAGTGCTTTTAATTTGGGGCAAGGTGG
Subunits for DNP-E/DNP-C	Common staple strand 32	ATGTGTAGGTAAAGAAATCACAAGGCTAAGAGAATAGGAAGAAATATTT
Subunits for DNP-E/DNP-C	Common staple strand 33	AATTTTATACCAACACATTTGATATACAGGAAGGGAAGGAGC
Subunits for DNP-E/DNP-C	Common staple strand 34	GAAACGTAGCACCAGAAAGATCTTTGAAAAATTGTCATGGTC
Subunits for DNP-E/DNP-C	Common staple strand 35	CAAGAATCAAAGTCTTTACAGTAAGAAAAGCGTCTTTGCACCCAGCTAC
Subunits for DNP-E/DNP-C	Common staple strand 36	AGAACCGCGCCGCCTTAAGAGAGCAAAGACCGCTTTTGGGAA
Subunits for DNP-E/DNP-C	Common staple strand 37	GTAGCGAGACTTGAAATGCAGCGAGGCGGGGGGATCGACTCT
Subunits for DNP-E/DNP-C	Common staple strand 38	CTTTTCAGTTTGCCGAAACCATTCGGTCGAAACCA
Subunits for DNP-E/DNP-C	Common staple strand 39	GAATTATGAGAAAA
Subunits for DNP-E/DNP-C	Common staple strand 40	TAGTACCTAAGTGCGGGGTTT
Subunits for DNP-E/DNP-C	Common staple strand 41	TCAACTCAATTTATGTACATATAACACCACGAACC
Subunits for DNP-E/DNP-C	Common staple strand 42	GCAGATTTTCTGGCTTGAGGACAAATCAGTTTTTA
Subunits for DNP-E/DNP-C	Common staple strand 43	CAGAATGGATGATACAGGACC
Subunits for DNP-E/DNP-C	Common staple strand 44	AACAACTTAACGATGAGCTTACGCTATTCGGTAATTTGAGAG
Subunits for DNP-E/DNP-C	Common staple strand 45	ATAACAGATACCGAGCCTGCACCAAAAAGGTGAAT
Subunits for DNP-E/DNP-C	Common staple strand 46	GCCGAACAAATCAAATGCGATCAGATGAAGGATTTCAAGAGT
Subunits for DNP-E/DNP-C	Common staple strand 47	AGAGGACGTATGTT
Subunits for DNP-E/DNP-C	Common staple strand 48	TCGGAACCGAGAAAGTAACAGTTGTGAAAGCAGCCAGAGGGT
Subunits for DNP-E/DNP-C	Common staple strand 49	GCGGATTATCTGCCGACGACG
Subunits for DNP-E/DNP-C	Common staple strand 50	AACAGCTTGCAGCAATTATCATAGCGCGGTAATCA
Subunits for DNP-E/DNP-C	Common staple strand 51	TCGCCATTTACCAGTGAGAGATTACCTTCACGCTGCATCGCC
Subunits for DNP-E/DNP-C	Common staple strand 52	ATTAAAATTGATTCGAACGAG
Subunits for DNP-E/DNP-C	Common staple strand 53	TCAATAAATATGTGAAGAGTCACCATCG
Subunits for DNP-E/DNP-C	Common staple strand 54	TAGATTTTTTTCATGGAAACACAAAATCGTTGCGCGGCTTGC
Subunits for DNP-E/DNP-C	Common staple strand 55	CCCGACTTAGCAAGAGGTTATATACCAACCTTGCTGTTGTAG
Subunits for DNP-E/DNP-C	Common staple strand 56	AATTGAGAGAGAGAGCAGATA
Subunits for DNP-E/DNP-C	Common staple strand 57	ATACATTTCGCAATAGTACGGTGTCTGGGAAGATAAAACATCAACATGT
Subunits for DNP-E/DNP-C	Common staple strand 58	TTTAAGATCATTCATTAATCATACCTTTCGTCAATCGTGGAC
Subunits for DNP-E/DNP-C	Common staple strand 59	TAAGTTTCGACCTGTACGAGGAGTCAGAGAAGCCCATGGGAT
Subunits for DNP-E/DNP-C	Common staple strand 60	TGGTTTACGATTGACACCAGTCACCAATATAGCCCAAATCACCGGAACC
Subunits for DNP-E/DNP-C	Common staple strand 61	CCCACCACCGTATCGGTTTAT
Subunits for DNP-E/DNP-C	Common staple strand 62	GCAATGCTCAACCGGCTATTTCGTAAAAAATCAGATTAAATT
Subunits for DNP-E/DNP-C	Common staple strand 63	GTCTTTCCGTAGGAATCATAA
Subunits for DNP-E/DNP-C	Common staple strand 64	GCGAAAACCAGGGTGGAGAGG
Subunits for DNP-E/DNP-C	Common staple strand 65	CGGAGTGAGACAGCTGCTGTAAACCTTGGTCAATCTGCCGGA
Subunits for DNP-E/DNP-C	Common staple strand 66	CGCCACCAACGAGGGTAGCCC
Subunits for DNP-E/DNP-C	Common staple strand 67	AAGGTAAATAGAAACATAAAG
Subunits for DNP-E/DNP-C	Common staple strand 68	TGAATAAACAGGTA
Subunits for DNP-E/DNP-C	Common staple strand 69	ACAGTATCGGAAACCTATTATCATAGTACAAACAACAGTCTC
Subunits for DNP-E/DNP-C	Common staple strand 70	AGAGCCACGGCATTCCAGAAGATAATCCGTTGCGCTACGAGC
Subunits for DNP-E/DNP-C	Common staple strand 71	TGGAAATCTATCGGGTTACAATTTTAGTTTCCAAGCGAGCAT
Subunits for DNP-E/DNP-C	Common staple strand 72	CGGCCAATAATTGCTGATTGTTTGAGATGCAAAATGGGAGGG
Subunits for DNP-E/DNP-C	Common staple strand 73	GGATTAGCCTAAAAGGCTTAG
Subunits for DNP-E/DNP-C	Common staple strand 74	TTTTCATCTTATCATAATTTC
Subunits for DNP-E/DNP-C	Common staple strand 75	ATAACGTGCTTTCCAGGCTGCGCGTAACAGGCTTGTTACCGAAGCCCAA
Subunits for DNP-E/DNP-C	Common staple strand 76	TGGTTGCTTTGACGCCCGCCGAGGGCGCAACGTGGCCTAAAGTCAAGTT
Subunits for DNP-E/DNP-C	Common staple strand 77	AGAGAGTGATTGCCACCTGTC
Subunits for DNP-E/DNP-C	Common staple strand 78	AACCATCTCAAAGGTAATAGAGCCTAATTATCCCA
Subunits for DNP-E/DNP-C	Common staple strand 79	TGTTAAATTTTTAATGGCTTACTAAAGTTCGTCAC
Subunits for DNP-E/DNP-C	Common staple strand 80	CCCATCCAAGTCCTGTCCAGA
Subunits for DNP-E/DNP-C	Common staple strand 81	GGCGAAACAGACGGCATATAATTTTGTC
Subunits for DNP-E/DNP-C	Common staple strand 82	GCAAAGAGCCGGAAATACATACATTATC
Subunits for DNP-E/DNP-C	Common staple strand 83	GTAGAAATGACCAATCATCAGTTGGATTGAACAAACCAGCAG
Subunits for DNP-E/DNP-C	Common staple strand 84	AAGCCTTTTACAAAGGAGCACGGATTCGCAATATTTGTCCAT
Subunits for DNP-E/DNP-C	Common staple strand 85	AATCCTTCATTTTCGGAGGTT
Subunits for DNP-E/DNP-C	Common staple strand 86	ACCGTCTATCAGAGATCTTTAATTACCGCGCCCAATGCGGGAGGTTTTG
Subunits for DNP-E/DNP-C	Common staple strand 87	TTGTTTATGAAAATTTACCTTCGTAACATGCGCCGCGTACTA
Subunits for DNP-E/DNP-C	Common staple strand 88	TAATAAGGAATTAAAAACAGGTATTATTTTGCCAGAAATCAAGATTAGT
Subunits for DNP-E/DNP-C	Common staple strand 89	AGCTATCCCCTGACTGAGATGCAATAACTAACAACGCGAAAA
Subunits for DNP-E/DNP-C	Common staple strand 90	ATCTTAGGCTTTGACTAAAATTAATAAA
Subunits for DNP-E/DNP-C	Common staple strand 91	TTCTTAAACCGATAATAGGTCTATAAAGTAATACTAAGCCTT
Subunits for DNP-E/DNP-C	Common staple strand 92	GGGGAAAGGAGAAAGTTTAATAACATAACTGAACA
Subunits for DNP-E/DNP-C	Common staple strand 93	CCCTGAATGAGTTAAGCCCTT
Subunits for DNP-E/DNP-C	Common staple strand 94	TTCCGGCCGGATTGACGCCAAAAATCACCGTCACCCAGAATC
Subunits for DNP-E/DNP-C	Common staple strand 95	ACAATCAATATTGAGGGAATTCAGCACCTTTTCATCCACCGGAACCGCC
Subunits for DNP-E/DNP-C	Common staple strand 96	CCCTTCTCAAATCA
Subunits for DNP-E/DNP-C	Common staple strand 97	TCCCTCACAGACTGTCATATTCCTGATCGGCCCTG
Subunits for DNP-E/DNP-C	Common staple strand 98	GGCTTTTGAAAGCGATAAATCGAGGTTGCCAGAGCCCACCCTCAGAGCC
Subunits for DNP-E/DNP-C	Common staple strand 99	ATTCAACCCAGCGCAGCAAAC
Subunits for DNP-E/DNP-C	Common staple strand 100	TCCTGTTATTATCA
Subunits for DNP-E/DNP-C	Common staple strand 101	CCGGCGATGGCCCACCAGCCA
Subunits for DNP-E/DNP-C	Common staple strand 102	GACGGGAAGCAAGAAACAAGCAGAACGCCCAATCAATAATTA
Subunits for DNP-E/DNP-C	Common staple strand 103	AGGGAGTTTTTGCGTTGAGAA
Subunits for DNP-E/DNP-C	Common staple strand 104	GGCAAAAACTCCTC
Subunits for DNP-E/DNP-C	Common staple strand 105	GTAGAAAGCCTGTTAACATGTTCAGCTACGCTGAC
Subunits for DNP-E/DNP-C	Common staple strand 106	TGCTCAGATGCCACTAGCGATAAATCGTATTGCTGTTAAATC
Subunits for DNP-E/DNP-C	Common staple strand 107	TCGCACTCCAGCAACTTCACC
Subunits for DNP-E/DNP-C	Common staple strand 108	AATAGATTAATTTAAACGGGTGCAAGCCGATATAGGTTTTAGCGAACCT
Subunits for DNP-E/DNP-C	Common staple strand 109	AATACTGAAAATGT
Subunits for DNP-E/DNP-C	Common staple strand 110	CAACTAACCAAAAGTCAGTATAATCAATCCTGTTTATAGTAG
Subunits for DNP-E/DNP-C	Common staple strand 111	TATTCATAAGTTTAAAGAAAC
Subunits for DNP-E/DNP-C	Common staple strand 112	TTATATGCAACTAAGTACCCC
Subunits for DNP-E/DNP-C	Common staple strand 113	AAGTTCATTGACAGCTCATTAAAGGAATCTCCATGTTAAGTTCAAGCTT
Subunits for DNP-E/DNP-C	Common staple strand 114	CTCGAATTCGTAATTATCCGCATAAAGTCTCACATCGCGCGGGGTTTTT
Subunits for DNP-E/DNP-C	Common staple strand 115	AGGTCACGTTGGCTAAAAAGAAGTGCCTTTAGCGTGAGCCGCCACCCTC
Subunits for DNP-E/DNP-C	Common staple strand 116	AGGGTTGGTACTCAAGGGATACTGAGTTTTTGTCGATGGGATTTTGCTA
Subunits for DNP-E/DNP-C	Common staple strand 117	GAGGCGGGAGCCTTTAATTACAGAATAGAAAGGAA
Subunits for DNP-E/DNP-C	Common staple strand 118	TGAATTTTAAGCGTGTCAGTG
Subunits for DNP-E/DNP-C	Common staple strand 119	GTGTGATTAATTCT
Subunits for DNP-E/DNP-C	Common staple strand 120	TTTAATGAATATAACCTCATAACGCCTG
Subunits for DNP-E/DNP-C	Common staple strand 121	TTTCCATTTGCGGACCAATAG
Subunits for DNP-E/DNP-C	Common staple strand 122	ATCAAAAATAAGAG
Subunits for DNP-E/DNP-C	Capturing cholesterol strand 1	TTTCTGTTCTTTCCGTCATTTAGCGTCCGCAAACATCAGGTCCTACGTATCTTCCTT
Subunits for DNP-E/DNP-C	Capturing cholesterol strand 2	AGATGATCCAGTCGGGCCTCTCTACGTATCTTCCTT
Subunits for DNP-E/DNP-C	Capturing cholesterol strand 3	GCTGTAGATGGGCGAGGAAGACTACGTATCTTCCTT
Subunits for DNP-E/DNP-C	Capturing cholesterol strand 4	ATAATCACCTTATTTTTTGCGATACTTCGAGCTAAGTAAAGCCTACGTATCTTCCTT
Subunits for DNP-E/DNP-C	Capturing cholesterol strand 5	TTCCTTCTATGCATCAGGCTGCGCCAGGGAAATCCGTAACGGGCATACAT
Subunits for DNP-E/DNP-C	Capturing cholesterol strand 6	TTCCTTCTATGCATCCATCAATGACCCTGCCAACGC
Subunits for DNP-E/DNP-C	Capturing cholesterol strand 7	AGGGACACACCAGTACGCTCACTACGTATCTTCCTT
Subunits for DNP-E/DNP-C	Capturing cholesterol strand 8	TTCCTTCTATGCATCGCATGCCTGCAGGTGTGCTGCCGGTGCGGGCAGCT
Subunits for DNP-E/DNP-C	Capturing cholesterol strand 9	TCGATAGAGAGCCATTAGGAATAAGGGATCCACACTACCGAGCTACGTATCTTCCTT
Subunits for DNP-E/DNP-C	Capturing cholesterol strand 10	TTCCTTCTATGCATCGAGGGTATTCTAGCATACGTATAAACGGCTACAGA
Subunits for DNP-E/DNP-C	Capturing cholesterol strand 11	CAGCTTGGACAACAAATAGTGATGAGGAACCAAAAGATAAAACTACGTATCTTCCTT
Subunits for DNP-E/DNP-C	Capturing cholesterol strand 12	CTAAATTTATAATCCTAAACACTACGTATCTTCCTT
Subunits for DNP-E/DNP-C	Capturing cholesterol strand 13	ATCCAAAAGAGAATTTCAACTGTGAATACACCACAAGCACGTCTACGTATCTTCCTT
Subunits for DNP-E/DNP-C	Capturing cholesterol strand 14	ACCAGCAAAGTTTCCCATTAGCTACGTATCTTCCTT
Subunits for DNP-E/DNP-C	Capturing cholesterol strand 15	CACGCTGCCAGTGAAATGAATCTACGTATCTTCCTT
Subunits for DNP-E/DNP-C	Capturing cholesterol strand 16	TTCCTTCTATGCATCGGGCGCTCGCTTAAAAGCTGCAAAGTAATAACCCA
Subunits for DNP-E/DNP-C	Capturing cholesterol strand 17	GCGAGGCAAGGCTTACAGTTGCAGAGGCTAGAAGATTAGTAACTACGTATCTTCCTT
Subunits for DNP-E/DNP-C	Capturing cholesterol strand 18	AGCTCATATTCGCAAAAGCCCCTACGTATCTTCCTT
Subunits for DNP-E/DNP-C	Capturing cholesterol strand 19	TCCAACGACCCAAAGGAGCCCCTACGTATCTTCCTT
Subunits for DNP-E/DNP-C	Capturing cholesterol strand 20	CAGTACACCACCCTGAAAACATACGAAGATGATATCTGAGTACTACGTATCTTCCTT
Subunits for DNP-E/DNP-C	Capturing cholesterol strand 21	TTCCTTCTATGCATCCACGCAACCACCGAACCAGAAATTGAAATAGCAAT
Subunits for DNP-E/DNP-C	Capturing Cy3 strand 1	CAGCATGCTAGCCAATACTGTGTTTTTAATGGTAATAAACTATCAAC
Subunits for DNP-E/DNP-C	Capturing Cy3 strand 2	CAGCATGCTAGCGGTTGATCTAGCATCTTCTGTAGCTTAGCACCCTCTCAGAAC
Subunits for DNP-E/DNP-C	Capturing Cy3 strand 3	CAGCATGCTAGCATCTACACATCAATGCACCAAGATTAGCCGTCGAG
Subunits for DNP-E/DNP-C	Capturing Cy3 strand 4	CAGCATGCTAGCCGGAAGCTCACAATACCGAACATACATAATTCATA
Subunits for DNP-E/DNP-C	Capturing Cy3 strand 5	CAGCATGCTAGCTAGCATTAAAGCAAATAATGG
Subunits for DNP-E/DNP-C	Capturing Cy3 strand 6	CAGCATGCTAGCGGGCGATAAGGCGATTACTTACAGTGTACTGGTAA
Subunits for DNP-E/DNP-C	Capturing Cy3 strand 7	CAGCATGCTAGCTTGCAACTCCAGAACCTGATTTAGTAAAATCGGCT
Subunits for DNP-E/DNP-C	Capturing Cy3 strand 8	CAGCATGCTAGCTTTAAAT
Subunits for DNP-E/DNP-C	Capturing Cy3 strand 9	CAGCATGCTAGCAGAGGATCCCCGGGAACAGCT
Subunits for DNP-E/DNP-C	Capturing Cy3 strand 10	CAGCATGCTAGCAATCAGA
Subunits for DNP-E/DNP-C	Capturing Cy3 strand 11	CAGCATGCTAGCTGTAGCGGTCACTCACTTGAC
Subunits for DNP-E/DNP-C	Capturing Cy3 strand 12	CAGCATGCTAGCGTGCCAGCCGCTTTGGCAATTTTCAACTGCCATTTCGGAAAT
Subunits for DNP-E	Common staple strand 1	AAACCAAGAAACAAAGTACAATTAATGCCCCCTGC
Subunits for DNP-E	Common staple strand 2	ACAAACAATGTAAATGCTGATCGGAATCATAATTAAGCCAGTAATAAGA
Subunits for DNP-E	Common staple strand 3	GCACGTAAAAATCTACGTTAAAGGCTGGCTGACCTATACCCAAAAGAAC
Subunits for DNP-E	Common staple strand 4	AGACAATATTTTTGAACCTCAAATATCATGATGAA
Subunits for DNP-E	Common staple strand 5	GGTTCCGAAATCGGAATTTTAAAAGTTTGTTAGAACCTACCAAACTAAC
Subunits for DNP-E	Common staple strand 6	ACAACTCAATAAAGAAATTGCCCAGTCA
Subunits for DNP-E	Common staple strand 7	TTAGACTTTCAGGT
Subunits for DNP-E	Common staple strand 8	AAGCGTAAGAATACAATCAATATCTGGTAATTACCTGAGCAACAATCGC
Subunits for DNP-E	Common staple strand 9	TGGCATGGGCGCATTAAAACGTATCAAACGTTATTCAAAATC
Subunits for DNP-E	Common staple strand 10	ATTAGTCTTTAATGATCTAAAGCATCACAACAAAATTAATTATAGGTTG
Subunits for DNP-E	Common staple strand 11	TCGTTTATTGTATC
Subunits for DNP-E	Common staple strand 12	GGAACAACGGTGTACAGACCAATTAAGACTCCTTA
Subunits for DNP-E	Common staple strand 13	CGAGCTTTAAATCA
Subunits for DNP-E	Common staple strand 14	AATGCTTAGAGGCTTTTGCAACCCAGCGATTATACGGAACCTATTATTC
Subunits for DNP-E	Common staple strand 15	GAGGGGGCTAAAACACTCATCTGAAAGTATTAAGA
Subunits for DNP-E	Common staple strand 16	TGAGCGAGTAACAAAACCAGACCGGAAGTTCAGAAAACGAGAACGATAA
Subunits for DNP-E	Common staple strand 17	GCAGCAACAATTTC
Subunits for DNP-E	Common staple strand 18	CCCGAGATAGGGTTCAATTCG
Subunits for DNP-E	Common staple strand 19	GCGTCTGGCCTTCCTACCTTTAATTGCTGTCATAAATATTCATTTGCCA
Subunits for DNP-E	Common staple strand 20	GGTTATAAAGCCTGTTTAGTAATTTAGGCAGAGGC
Subunits for DNP-E	Common staple strand 21	AGCTTTCATCAACACAACAGGTCAGGATCCCCTCA
Subunits for DNP-E	Common staple strand 22	CCAGAAGGAAACCGAGAACCGCATTATAGTAGATTTTACAAAGAGTGTTGTTCCAG
Subunits for DNP-E	Common staple strand 23	TGAAACATTTGACCAAGAAGTTTGAATCTAGAGAGTGTAGCC
Subunits for DNP-E	Common staple strand 24	GAATATATAAACACGCAAATCAAGAAGAAACCCTCGTGGCAC
Subunits for DNP-E	Common staple strand 25	GGACGTTGAGTAATCTTGACAAGGAAACGCAATAA
Subunits for DNP-E	Common staple strand 26	GCCCGTATAAACAGCGGAGATCCAGACGATGACCACAAAGCGCCCGTCGGATTCTC
Subunits for DNP-E	Common staple strand 27	AACGCCAACATGTATCATATGTCCGGCTCATTTAAATGAAAACGCGAACTGATAGC
Subunits for DNP-E	Common staple strand 28	AAGACAAGCGTTAAATAAGAAAAGTACCGACAAAA
Subunits for DNP-E	Common staple strand 29	TTTAACCCGTTATA
Subunits for DNP-E	Common staple strand 30	CCTTATAAATCAAAATCCTTTGCCCGAAATTATTT
Subunits for DNP-E	Common staple strand 31	ACTGGCTGATATTC
Subunits for DNP-E	Common staple strand 32	AACTGATGGT
Subunits for DNP-E	Common staple strand 33	ATCGCCTTAA
Subunits for DNP-E	Common staple strand 34	AGTCGGAATC
Subunits for DNP-E	Common staple strand 35	GAGGAATACA
Subunits for DNP-E	Common staple strand 36	CGCTCATTTC
Subunits for DNP-E	Common staple strand 37	TTGATAATTC
Subunits for DNP-E	Common staple strand 38	ATTACCCAAA
Subunits for DNP-E	Common staple strand 39	CGTGGGATTT
Subunits for DNP-E	Common staple strand 40	TTAACGTTTT
Subunits for DNP-E	Common staple strand 41	TTTGGAAAGA
Subunits for DNP-E	Common staple strand 42	GCAAGATGAA
Subunits for DNP-E	Common staple strand 43	AAAATCAATA
Subunits for DNP-E	Common staple strand 44	ATTTGGAAGG
Subunits for DNP-E	Common staple strand 45	CAAATTCATT
Subunits for DNP-E	Common staple strand 46	CCTAAAAAGA
Subunits for DNP-E	Common staple strand 47	TGGGACCTGA
Subunits for DNP-E	Common staple strand 48	ATTTGAACTA
Subunits for DNP-E	Common staple strand 49	AAGAAATAAG
Subunits for DNP-C	Common staple strand 1	AAACCAAGAAACAAAGTACAATTAATGCCCCCTGC
Subunits for DNP-C	Common staple strand 2	ACAAACAATGTAAATGCTGATCGGAATCATAATTAAGCCAGTAATAAGA
Subunits for DNP-C	Common staple strand 3	GCACGTAAAAATCTACGTTAAAGGCTGGCTGACCTATACCCAAAAGAAC
Subunits for DNP-C	Common staple strand 4	AGACAATATTTTTGAACCTCAAATATCATGATGAA
Subunits for DNP-C	Common staple strand 5	GGTTCCGAAATCGGAATTTTAAAAGTTTGTTAGAACCTACCAAACTAAC
Subunits for DNP-C	Common staple strand 6	ACAACTCAATAAAGAAATTGCCCAGTCA
Subunits for DNP-C	Common staple strand 7	TTAGACTTTCAGGT
Subunits for DNP-C	Common staple strand 8	AAGCGTAAGAATACAATCAATATCTGGTAATTACCTGAGCAACAATCGC
Subunits for DNP-C	Common staple strand 9	TGGCATGGGCGCATTAAAACGTATCAAACGTTATTCAAAATC
Subunits for DNP-C	Common staple strand 10	ATTAGTCTTTAATGATCTAAAGCATCACAACAAAATTAATTATAGGTTG
Subunits for DNP-C	Common staple strand 11	TCGTTTATTGTATC
Subunits for DNP-C	Common staple strand 12	GGAACAACGGTGTACAGACCAATTAAGACTCCTTA
Subunits for DNP-C	Common staple strand 13	CGAGCTTTAAATCA
Subunits for DNP-C	Common staple strand 14	AATGCTTAGAGGCTTTTGCAACCCAGCGATTATACGGAACCTATTATTC
Subunits for DNP-C	Common staple strand 15	GAGGGGGCTAAAACACTCATCTGAAAGTATTAAGA
Subunits for DNP-C	Common staple strand 16	TGAGCGAGTAACAAAACCAGACCGGAAGTTCAGAAAACGAGAACGATAA
Subunits for DNP-C	Common staple strand 17	GCAGCAACAATTTC
Subunits for DNP-C	Common staple strand 18	CCCGAGATAGGGTTCAATTCG
Subunits for DNP-C	Common staple strand 19	GCGTCTGGCCTTCCTACCTTTAATTGCTGTCATAAATATTCATTTGCCA
Subunits for DNP-C	Common staple strand 20	GGTTATAAAGCCTGTTTAGTAATTTAGGCAGAGGC
Subunits for DNP-C	Common staple strand 21	AGCTTTCATCAACACAACAGGTCAGGATCCCCTCA
Subunits for DNP-C	Common staple strand 22	CCAGAAGGAAACCGAGAACCGCATTATAGTAGATTTTACAAAGAGTGTTGTTCCAG
Subunits for DNP-C	Common staple strand 23	TGAAACATTTGACCAAGAAGTTTGAATCTAGAGAGTGTAGCC
Subunits for DNP-C	Common staple strand 24	GAATATATAAACACGCAAATCAAGAAGAAACCCTCGTGGCAC
Subunits for DNP-C	Common staple strand 25	GGACGTTGAGTAATCTTGACAAGGAAACGCAATAA
Subunits for DNP-C	Common staple strand 26	GCCCGTATAAACAGCGGAGATCCAGACGATGACCACAAAGCGCCCGTCGGATTCTC
Subunits for DNP-C	Common staple strand 27	AACGCCAACATGTATCATATGTCCGGCTCATTTAAATGAAAACGCGAACTGATAGC
Subunits for DNP-C	Common staple strand 28	AAGACAAGCGTTAAATAAGAAAAGTACCGACAAAA
Subunits for DNP-C	Common staple strand 29	TTTAACCCGTTATA
Subunits for DNP-C	Common staple strand 30	CCTTATAAATCAAAATCCTTTGCCCGAAATTATTT
Subunits for DNP-C	Common staple strand 31	ACTGGCTGATATTC
Subunits for DNP-C	Common staple strand 32	TCAATAACCCTGGTATTTAATAGTCGG
Subunits for DNP-C	Common staple strand 33	CCCAAAGTTATGGTATTTTACGCAAGA
Subunits for DNP-C	Common staple strand 34	TTCATTTAACTGGTATTGGTAAAGAAA
Subunits for DNP-C	Common staple strand 35	GGATTTAATTTGGTATTCCTTTTGATA
Subunits for DNP-C	Common staple strand 36	CCTTAACAGTTGGTATTGGCTGAGGAA
Subunits for DNP-C	Common staple strand 37	GAACTACCTTTGGTATTAGAACGCTCA
Subunits for DNP-C	Common staple strand 38	CGTTTTAAGATGGTATTCATTATTTGG
Subunits for DNP-C	Common staple strand 39	GAAAGAAGTATGGTATTGAGTAACTGA
Subunits for DNP-C	Common staple strand 40	AAAAGAGCCATGGTATTCAGTTGGGAC

## Sheet: Triggers
Name	Sequence (5'-3')	Color
Triggers (strand 1)	CCTAAAAAGAGCCATGGTATTCAGTTGGGACCTGA
Triggers (strand 2)	ATCGCCTTAACAGTTGGTATTGGCTGAGGAATACA
Triggers (strand 3)	ATTACCCAAAGTTATGGTATTTTACGCAAGATGAA
Triggers (strand 4)	TTAACGTTTTAAGATGGTATTCATTATTTGGAAGG
Triggers (strand 5)	AAAATCAATAACCCTGGTATTTAATAGTCGGAATC
Triggers (strand 6)	CAAATTCATTTAACTGGTATTGGTAAAGAAATAAG
Triggers (strand 7)	ATTTGAACTACCTTTGGTATTAGAACGCTCATTTC
Triggers (strand 8)	CGTGGGATTTAATTTGGTATTCCTTTTGATAATTC
Triggers (strand 9)	TTTGGAAAGAAGTATGGTATTGAGTAACTGATGGT

## Sheet: Reverse triggers
Name	Sequence (5'-3')	Color
Reverse triggers (strand 1)	TTAACGTTTTAAGA
Reverse triggers (strand 2)	ATTACCCAAAGTTA
Reverse triggers (strand 3)	CGTGGGATTTAATT
Reverse triggers (strand 4)	GGTAAAGAAATAAGAGAACGCTCATTTCCAGTTGGGACCTGA
Reverse triggers (strand 5)	ATTTGAACTACCTT
Reverse triggers (strand 6)	AAAATCAATAACCC
Reverse triggers (strand 7)	ATCGCCTTAACAGT
Reverse triggers (strand 8)	GGCTGAGGAATACATAATAGTCGGAATCCCTTTTGATAATTC
Reverse triggers (strand 9)	TTTGGAAAGAAGTA
Reverse triggers (strand 10)	CCTAAAAAGAGCCA
Reverse triggers (strand 11)	CAAATTCATTTAAC
Reverse triggers (strand 12)	TTACGCAAGATGAACATTATTTGGAAGGGAGTAACTGATGGT

## Sheet: Random strands
Name	Sequence (5'-3')	Color
Random strand 1	ATCAAACCGT
Random strand 2	ATGACTACAC
Random strand 3	GTGCGACAGC
Random strand 4	GCGTGATATT
Random strand 5	CATATATGGC
Random strand 6	TTGATCACTC
Random strand 7	TATACCCAGA
Random strand 8	CTGGCGATAT
Random strand 9	AATCCGTAGC
Random strand 10	ATCGGCTCGT
